# Supplementary material for: Examining the sustainability and effectiveness of co-created physical activity interventions in vocational education and training: a multimethod evaluation
Source: Springer Nature journal article supplement (doi:10.1186/s12889-022-13133-9), 2022-04-15
Supplement: MOESM1 [file 20315592]

## Additional file 1: Information on the implementation status of intervention components of the multi-component intervention

Table 1: Information on the implementation status of the multi-component intervention's components in the nursing care sector ( $n = 4$ )

| Intervention component and description                                                                                                                    | No information (n) | Implementation status |             |                                                |                     |                                                  | Sustainability                          |                                             |
|-----------------------------------------------------------------------------------------------------------------------------------------------------------|--------------------|-----------------------|-------------|------------------------------------------------|---------------------|--------------------------------------------------|-----------------------------------------|---------------------------------------------|
|                                                                                                                                                           |                    | Implemented (n)       | Planned (n) | Initially implemented, but not perpetuated (n) | Not implemented (n) | Not implemented due to COVID-19 restrictions (n) | Sustainable implementation possible (n) | Sustainable implementation not possible (n) |
| <b>BuG lesson</b><br>Weekly 90-min lesson during regular school hours in each class, covering the theory and practice of PA and health                    | 0                  | 0                     | 1           | 0                                              | 0                   | 3                                                | 4                                       | 0                                           |
| <b>Trainer qualification for teachers</b><br>Teachers participate voluntarily in a workshop that qualifies them to conduct the BuG lesson                 | 0                  | 2                     | 1           | 0                                              | 1                   | 0                                                | 4                                       | 0                                           |
| <b>Information for teachers</b><br>Information about the project and the developed during a teachers' conference                                          | 0                  | 2                     | 0           | 0                                              | 1                   | 1                                                | 3                                       | 1                                           |
| <b>Toolbox</b><br>PowerPoint presentation for active breaks with instructions for strength, coordination, and concentration exercises                     | 0                  | 0                     | 0           | 2                                              | 0                   | 2                                                | 4                                       | 0                                           |
| <b>Preserving position of a physical education teacher</b><br>Recruitment of a new physical education teacher after the retirement of the current teacher | 1                  | 0                     | 1           | 0                                              | 2                   | 0                                                | 2                                       | 1                                           |
| <b>Trainer qualification for students</b><br>Students participate voluntarily in a workshop that qualifies them to instruct physical exercises            | 3                  | 0                     | 0           | 0                                              | 1                   | 0                                                | 1                                       | 0                                           |
| <b>Adaptation of mission statement</b><br>PA as part of the mission statement of the VET center                                                           | 2                  | 2                     | 0           | 0                                              | 0                   | 0                                                | 2                                       | 0                                           |

BuG = Ger. "Bewegt und Gesund", Eng. Physical activity and health; PA = physical activity; VET = vocational education and training

**Table 2: Information on the implementation status of the multi-component intervention's components in the automotive mechatronics sector ( $n = 3$ )**

| Intervention component and description                                                                                                                                                                    | No information (n) | Implementation status |             |                                                |                     |                                                  | Sustainability                          |                                             |
|-----------------------------------------------------------------------------------------------------------------------------------------------------------------------------------------------------------|--------------------|-----------------------|-------------|------------------------------------------------|---------------------|--------------------------------------------------|-----------------------------------------|---------------------------------------------|
|                                                                                                                                                                                                           |                    | Implemented (n)       | Planned (n) | Initially implemented, but not perpetuated (n) | Not implemented (n) | Not implemented due to COVID-19 restrictions (n) | Sustainable implementation possible (n) | Sustainable implementation not possible (n) |
| <b>Tutoring system</b><br>Apprentices participate voluntarily in a workshop enabling them to act as tutors to promote PA and health among their peers                                                     | 0                  | 0                     | 0           | 3                                              | 0                   | 0                                                | 1                                       | 2                                           |
| <b>Adaptation of "Fit &amp; Healthy Workshop"</b><br>Integration of an additional section on PA and health into an existing workshop for first-year apprentices                                           | 0                  | 0                     | 0           | 3                                              | 0                   | 0                                                | 1                                       | 2                                           |
| <b>Creation of PA opportunities</b><br>Capabilities for PA in the educational and working environment of apprentices, e.g. slots for PA in everyday work routine, exercises at the apprentices' workplace | 1                  | 1                     | 0           | 1                                              | 0                   | 0                                                | 2                                       | 0                                           |
| <b>Information for instructors</b><br>Information about health-enhancing PA and tutoring workshop during a quarterly instruction                                                                          | 1                  | 0                     | 0           | 2                                              | 0                   | 0                                                | 2                                       | 0                                           |
| <b>Instructor workshop</b><br>Automotive mechatronics instructors participate in a workshop on the subject of PA and health                                                                               | 1                  | 0                     | 0           | 2                                              | 0                   | 0                                                | 1                                       | 1                                           |
| <b>Adaptation of works agreement</b><br>PA as part of the works agreement of the VET center                                                                                                               | 0                  | 2                     | 0           | 1                                              | 0                   | 0                                                | 3                                       | 0                                           |
| <b>Adaptation of mission statement</b><br>PA as part of the mission statement of the VET center                                                                                                           | 2                  | 0                     | 0           | 0                                              | 1                   | 0                                                | 0                                       | 1                                           |

PA = physical activity; VET = vocational education and training
