# Supplementary material for: Examining the sustainability and effectiveness of co-created physical activity interventions in vocational education and training: a multimethod evaluation
Source: Springer Nature journal article supplement (doi:10.1186/s12889-022-13133-9), 2022-04-15
Supplement: MOESM4 [file 20315592]

## Additional file 4: Appraisal of intervention components of the multi-component intervention

Table 1: Appraisal of the multi-component intervention's components in the nursing care sector (n = 4)

| The intervention component <i>BuG lesson</i> (Ger. "Bewegt und Gesund", Eng. <i>Physical activity and health</i> )... |                |  |                  |                   |  |
|-----------------------------------------------------------------------------------------------------------------------|----------------|--|------------------|-------------------|--|
| ... offers the apprentices a new capability to be physically active.                                                  | Does not apply |  | Strongly applies | n = 4<br>M = 3.75 |  |
| ... contributes to the apprentices getting more physically active.                                                    | Does not apply |  | Strongly applies | n = 4<br>M = 2,75 |  |
| ... is tailored to the needs and requirements of the apprentices.                                                     | Does not apply |  | Strongly applies | n = 4<br>M = 3.25 |  |
| ... fits to the situation and the organizational conditions in our organization.                                      | Does not apply |  | Strongly applies | n = 4<br>M = 3.00 |  |
| ... has a great value in our organization compared to other activities/goals.                                         | Does not apply |  | Strongly applies | n = 4<br>M = 2.75 |  |
| The intervention component <i>Trainer qualification for teachers</i> ...                                              |                |  |                  |                   |  |
| ... offers the apprentices a new capability to be physically active.                                                  | Does not apply |  | Strongly applies | n = 4<br>M = 3.50 |  |
| ... contributes to the apprentices getting more physically active.                                                    | Does not apply |  | Strongly applies | n = 4<br>M = 2.25 |  |
| ... is tailored to the needs and requirements of the apprentices.                                                     | Does not apply |  | Strongly applies | n = 4<br>M = 3.25 |  |
| ... fits to the situation and the organizational conditions in our organization.                                      | Does not apply |  | Strongly applies | n = 4<br>M = 3.25 |  |
| ... has a great value in our organization compared to other activities/goals.                                         | Does not apply |  | Strongly applies | n = 4<br>M = 2.50 |  |

**The intervention component *Information for teachers...***

|                                                                                  |                |  |                  |                       |
|----------------------------------------------------------------------------------|----------------|--|------------------|-----------------------|
| ... offers the apprentices a new capability to be physically active.             | Does not apply |  | Strongly applies | $n = 4$<br>$M = 1.00$ |
| ... contributes to the apprentices getting more physically active.               | Does not apply |  | Strongly applies | $n = 4$<br>$M = 0.75$ |
| ... is tailored to the needs and requirements of the apprentices.                | Does not apply |  | Strongly applies | $n = 4$<br>$M = 2.00$ |
| ... fits to the situation and the organizational conditions in our organization. | Does not apply |  | Strongly applies | $n = 4$<br>$M = 2.25$ |
| ... has a great value in our organization compared to other activities/goals.    | Does not apply |  | Strongly applies | $n = 4$<br>$M = 2.00$ |

**The intervention component *Toolbox...***

|                                                                                  |                |  |                  |                       |
|----------------------------------------------------------------------------------|----------------|--|------------------|-----------------------|
| ... offers the apprentices a new capability to be physically active.             | Does not apply |  | Strongly applies | $n = 4$<br>$M = 2.75$ |
| ... contributes to the apprentices getting more physically active.               | Does not apply |  | Strongly applies | $n = 4$<br>$M = 2.00$ |
| ... is tailored to the needs and requirements of the apprentices.                | Does not apply |  | Strongly applies | $n = 4$<br>$M = 3.25$ |
| ... fits to the situation and the organizational conditions in our organization. | Does not apply |  | Strongly applies | $n = 4$<br>$M = 3.25$ |
| ... has a great value in our organization compared to other activities/goals.    | Does not apply |  | Strongly applies | $n = 4$<br>$M = 2.00$ |

**The intervention component *Preserving position of a physical education teacher...***

|                                                                                  |                |                                                                                    |                  |                       |
|----------------------------------------------------------------------------------|----------------|------------------------------------------------------------------------------------|------------------|-----------------------|
| ... offers the apprentices a new capability to be physically active.             | Does not apply |  | Strongly applies | $n = 3$<br>$M = 4.00$ |
| ... contributes to the apprentices getting more physically active.               | Does not apply |  | Strongly applies | $n = 3$<br>$M = 3.33$ |
| ... is tailored to the needs and requirements of the apprentices.                | Does not apply |  | Strongly applies | $n = 3$<br>$M = 4.00$ |
| ... fits to the situation and the organizational conditions in our organization. | Does not apply |  | Strongly applies | $n = 3$<br>$M = 3.67$ |
| ... has a great value in our organization compared to other activities/goals.    | Does not apply |  | Strongly applies | $n = 3$<br>$M = 1.33$ |

**The intervention component *Trainer qualification for students...***

|                                                                                  |                |                                                                                      |                  |                       |
|----------------------------------------------------------------------------------|----------------|--------------------------------------------------------------------------------------|------------------|-----------------------|
| ... offers the apprentices a new capability to be physically active.             | Does not apply |  | Strongly applies | $n = 1$<br>$M = 4.00$ |
| ... contributes to the apprentices getting more physically active.               | Does not apply |  | Strongly applies | $n = 1$<br>$M = 4.00$ |
| ... is tailored to the needs and requirements of the apprentices.                | Does not apply |  | Strongly applies | $n = 1$<br>$M = 4.00$ |
| ... fits to the situation and the organizational conditions in our organization. | Does not apply |  | Strongly applies | $n = 1$<br>$M = 4.00$ |
| ... has a great value in our organization compared to other activities/goals.    | Does not apply |  | Strongly applies | $n = 1$<br>$M = 1.00$ |

**The intervention component *Adaption of mission statement...***

|                                                                                  |                |                                                                                    |                  |                       |
|----------------------------------------------------------------------------------|----------------|------------------------------------------------------------------------------------|------------------|-----------------------|
| ... offers the apprentices a new capability to be physically active.             | Does not apply |  | Strongly applies | $n = 2$<br>$M = 2.00$ |
| ... contributes to the apprentices getting more physically active.               | Does not apply |  | Strongly applies | $n = 2$<br>$M = 1.00$ |
| ... is tailored to the needs and requirements of the apprentices.                | Does not apply |  | Strongly applies | $n = 2$<br>$M = 3.00$ |
| ... fits to the situation and the organizational conditions in our organization. | Does not apply |  | Strongly applies | $n = 2$<br>$M = 3.00$ |
| ... has a great value in our organization compared to other activities/goals.    | Does not apply |  | Strongly applies | $n = 2$<br>$M = 2.50$ |

**Table 2: Appraisal of the multi-component intervention's components in the automotive sector (n = 3)**

| The intervention component <i>Tutoring system</i> ...                            |                |                                                                                      |                  |                   |  |
|----------------------------------------------------------------------------------|----------------|--------------------------------------------------------------------------------------|------------------|-------------------|--|
| ... offers the apprentices a new capability to be physically active.             | Does not apply | 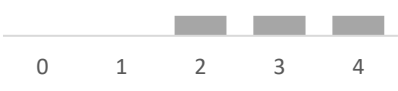   | Strongly applies | n = 3<br>M = 3.00 |  |
| ... contributes to the apprentices getting more physically active.               | Does not apply |    | Strongly applies | n = 3<br>M = 1.67 |  |
| ... is tailored to the needs and requirements of the apprentices.                | Does not apply |    | Strongly applies | n = 3<br>M = 3.33 |  |
| ... fits to the situation and the organizational conditions in our organization. | Does not apply |    | Strongly applies | n = 3<br>M = 3.00 |  |
| ... has a great value in our organization compared to other activities/goals.    | Does not apply |   | Strongly applies | n = 3<br>M = 1.33 |  |
| The intervention component <i>Adoption of "Fit &amp; Healthy Workshop"</i> ...   |                |                                                                                      |                  |                   |  |
| ... offers the apprentices a new capability to be physically active.             | Does not apply |  | Strongly applies | n = 3<br>M = 2.67 |  |
| ... contributes to the apprentices getting more physically active.               | Does not apply |  | Strongly applies | n = 3<br>M = 1.33 |  |
| ... is tailored to the needs and requirements of the apprentices.                | Does not apply |  | Strongly applies | n = 3<br>M = 3.00 |  |
| ... fits to the situation and the organizational conditions in our organization. | Does not apply |  | Strongly applies | n = 3<br>M = 2.00 |  |
| ... has a great value in our organization compared to other activities/goals.    | Does not apply |  | Strongly applies | n = 3<br>M = 1.33 |  |

**The intervention component *Creation of physical activity opportunities...***

|                                                                                  |                |                                                                                    |                  |                       |
|----------------------------------------------------------------------------------|----------------|------------------------------------------------------------------------------------|------------------|-----------------------|
| ... offers the apprentices a new capability to be physically active.             | Does not apply | 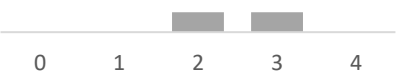 | Strongly applies | $n = 2$<br>$M = 2.50$ |
| ... contributes to the apprentices getting more physically active.               | Does not apply |  | Strongly applies | $n = 2$<br>$M = 1.50$ |
| ... is tailored to the needs and requirements of the apprentices.                | Does not apply |  | Strongly applies | $n = 2$<br>$M = 2.50$ |
| ... fits to the situation and the organizational conditions in our organization. | Does not apply |  | Strongly applies | $n = 2$<br>$M = 1.50$ |
| ... has a great value in our organization compared to other activities/goals.    | Does not apply |  | Strongly applies | $n = 2$<br>$M = 1.50$ |

**The intervention component *Information for instructors...***

|                                                                                  |                |                                                                                      |                  |                       |
|----------------------------------------------------------------------------------|----------------|--------------------------------------------------------------------------------------|------------------|-----------------------|
| ... offers the apprentices a new capability to be physically active.             | Does not apply |  | Strongly applies | $n = 2$<br>$M = 2.50$ |
| ... contributes to the apprentices getting more physically active.               | Does not apply |  | Strongly applies | $n = 2$<br>$M = 1.50$ |
| ... is tailored to the needs and requirements of the apprentices.                | Does not apply |  | Strongly applies | $n = 2$<br>$M = 2.00$ |
| ... fits to the situation and the organizational conditions in our organization. | Does not apply |  | Strongly applies | $n = 2$<br>$M = 1.50$ |
| ... has a great value in our organization compared to other activities/goals.    | Does not apply |  | Strongly applies | $n = 2$<br>$M = 1.50$ |

**The intervention component *Instructor workshop*...**

|                                                                                  |                |                                                                                     |                  |                       |
|----------------------------------------------------------------------------------|----------------|-------------------------------------------------------------------------------------|------------------|-----------------------|
| ... offers the apprentices a new capability to be physically active.             | Does not apply |   | Strongly applies | $n = 2$<br>$M = 3.00$ |
| ... contributes to the apprentices getting more physically active.               | Does not apply |   | Strongly applies | $n = 2$<br>$M = 1.50$ |
| ... is tailored to the needs and requirements of the apprentices.                | Does not apply |   | Strongly applies | $n = 2$<br>$M = 3.00$ |
| ... fits to the situation and the organizational conditions in our organization. | Does not apply |   | Strongly applies | $n = 2$<br>$M = 1.50$ |
| ... has a great value in our organization compared to other activities/goals.    | Does not apply |  | Strongly applies | $n = 2$<br>$M = 1.50$ |

**The intervention component *Adaption of works agreement*...**

|                                                                                  |                |                                                                                      |                  |                       |
|----------------------------------------------------------------------------------|----------------|--------------------------------------------------------------------------------------|------------------|-----------------------|
| ... offers the apprentices a new capability to be physically active.             | Does not apply |  | Strongly applies | $n = 3$<br>$M = 2.33$ |
| ... contributes to the apprentices getting more physically active.               | Does not apply |  | Strongly applies | $n = 3$<br>$M = 1.67$ |
| ... is tailored to the needs and requirements of the apprentices.                | Does not apply |  | Strongly applies | $n = 3$<br>$M = 2.33$ |
| ... fits to the situation and the organizational conditions in our organization. | Does not apply |  | Strongly applies | $n = 3$<br>$M = 2.33$ |
| ... has a great value in our organization compared to other activities/goals.    | Does not apply |  | Strongly applies | $n = 3$<br>$M = 2$    |

**The intervention component *Adaption of mission statement...***

|                                                                                  |                |                                                                                    |                  |                       |
|----------------------------------------------------------------------------------|----------------|------------------------------------------------------------------------------------|------------------|-----------------------|
| ... offers the apprentices a new capability to be physically active.             | Does not apply |  | Strongly applies | $n = 1$<br>$M = 3.00$ |
| ... contributes to the apprentices getting more physically active.               | Does not apply |  | Strongly applies | $n = 1$<br>$M = 3.00$ |
| ... is tailored to the needs and requirements of the apprentices.                | Does not apply |  | Strongly applies | $n = 1$<br>$M = 4.00$ |
| ... fits to the situation and the organizational conditions in our organization. | Does not apply |  | Strongly applies | $n = 1$<br>$M = 2.00$ |
| ... has a great value in our organization compared to other activities/goals.    | Does not apply |  | Strongly applies | $n = 1$<br>$M = 2.00$ |
