# Supplementary material for: Examining the sustainability and effectiveness of co-created physical activity interventions in vocational education and training: a multimethod evaluation
Source: Springer Nature journal article supplement (doi:10.1186/s12889-022-13133-9), 2022-04-15
Supplement: MOESM5 [file 20315592]

## Additional file 5: Summary table of factors influencing sustainability

Table 1: Summary table of factors influencing sustainability gathered from interviews with stakeholders from the nursing care ( $n = 2$ ) and automotive mechatronics ( $n = 2$ ) sectors

| Factors influencing sustainability                    | Automotive mechatronic                                                                                                                                                          | Nursing care                                                                                                                                                                                                                                                                                              |
|-------------------------------------------------------|---------------------------------------------------------------------------------------------------------------------------------------------------------------------------------|-----------------------------------------------------------------------------------------------------------------------------------------------------------------------------------------------------------------------------------------------------------------------------------------------------------|
| <b>Outer contextual factors</b>                       |                                                                                                                                                                                 |                                                                                                                                                                                                                                                                                                           |
| COVID-19 pandemic                                     | Negative influence on financial resources                                                                                                                                       | Negative influence on implementation status (due to lower relevance, lack of spatial resources) and personal stress                                                                                                                                                                                       |
| Legal framework                                       | <i>Not mentioned</i>                                                                                                                                                            |                                                                                                                                                                                                                                                                                                           |
| Law reform of the nursing professions                 | <i>Not mentioned</i>                                                                                                                                                            | Positive influence of the change to generalized nursing apprenticeship                                                                                                                                                                                                                                    |
| Liability                                             | <i>Not mentioned</i>                                                                                                                                                            | Obstacles due to liability issues                                                                                                                                                                                                                                                                         |
| Openness of the sector to physical activity promotion | <i>Not mentioned</i>                                                                                                                                                            | Existing openness of the nursing care sector to conduct similar projects                                                                                                                                                                                                                                  |
| <b>Inner contextual factors</b>                       |                                                                                                                                                                                 |                                                                                                                                                                                                                                                                                                           |
| Climate and culture                                   | Openness                                                                                                                                                                        | Openness, no perceived hierarchy, good working atmosphere                                                                                                                                                                                                                                                 |
| Cooperation                                           | External cooperation with service providers and health insurance company was important for intervention implementation and funding, but could not be sustained in the long-term | Internal cooperation with the hospital and other departments is partly problematic due to different interests and needs; External cooperation with service providers was important for intervention implementation; External cooperation with health insurance company for funding was sought, but failed |
| Decision-making                                       | Head of the automotive education sector made decisions                                                                                                                          | Heads of the nursing education program and of the school subject of nursing made decisions                                                                                                                                                                                                                |
| Embedment                                             | Embedment has failed; Physical activity must become a compulsory part of the vocational education program                                                                       | Intervention is part of the curriculum and scheduled with a fixed hourly quota; Regularity and continuity are required                                                                                                                                                                                    |
| Health-promoting leadership                           | No one at the management level feels responsible, project was delegated; Involvement of superiors would have been necessary                                                     | Headmaster rather uninvolved, but supportive; Heads of the nursing education program and of the school subject of nursing involved and with important function                                                                                                                                            |
| Ownership                                             | <i>Not mentioned</i>                                                                                                                                                            | Taking responsibility for the project and its intervention                                                                                                                                                                                                                                                |
| Personnel changes                                     | Personnel changes among stakeholders and apprentices with a strong negative impact                                                                                              | Personnel changes among stakeholders and apprentices are a challenge, but also an opportunity                                                                                                                                                                                                             |
| Relevance                                             | Physical activity promotion as an additional topic                                                                                                                              | Physical activity promotion as an additional topic                                                                                                                                                                                                                                                        |

|                             |                                                                                                                            |                                                                                                                                                                                                                                                                                                                            |
|-----------------------------|----------------------------------------------------------------------------------------------------------------------------|----------------------------------------------------------------------------------------------------------------------------------------------------------------------------------------------------------------------------------------------------------------------------------------------------------------------------|
| <b>Resources</b>            |                                                                                                                            |                                                                                                                                                                                                                                                                                                                            |
| Financial                   | Funding initially ensured by health insurance, but not in the long-term;<br>Cost-saving initiatives throughout the company | Budget is important;<br>Funding by health insurance company failed, but so far no difficulties with funding (budget was always released)                                                                                                                                                                                   |
| Personnel                   | Responsible person is required                                                                                             | Responsible person is available;<br>Coordinator is needed, as various persons are currently taking on this role in addition to their regular tasks                                                                                                                                                                         |
| Temporal                    | Temporal resources at the personnel level were provided                                                                    | Temporal resources at the personnel level were provided;<br>Temporal resources at the curriculum level are required                                                                                                                                                                                                        |
| Spatial-material            | <i>Not mentioned</i>                                                                                                       | Premises and materials are necessary, both were already available;<br>Premises not always freely accessible;<br>Some new material acquisitions                                                                                                                                                                             |
| Strategic planning          | Aligning and controlling did not take place                                                                                | Focusing and prioritizing intervention, setting clear goals, constantly aligning and refocusing                                                                                                                                                                                                                            |
| <b>Intervention factors</b> |                                                                                                                            |                                                                                                                                                                                                                                                                                                                            |
| Acceptance                  | Intervention was considered good                                                                                           | Not all intervention components are equally accepted by apprentices (preferences exist), but overall well accepted                                                                                                                                                                                                         |
| Effectiveness               | Intervention's effectiveness was rated positively                                                                          | Intervention's effectiveness was rated positively                                                                                                                                                                                                                                                                          |
| Fit                         | Intervention assessed as appropriate for the target group                                                                  | Intervention assessed as appropriate for both the target group and setting                                                                                                                                                                                                                                                 |
| Flexibility                 | <i>Not mentioned</i>                                                                                                       | Flexibility in implementing the BuG lesson (Ger. "Bewegt und Gesund", Eng. Physical activity and health)                                                                                                                                                                                                                   |
| <b>Personal factors</b>     |                                                                                                                            |                                                                                                                                                                                                                                                                                                                            |
| Attitude and mindset        | Trainers who exemplify it should endorse it and have an affinity for sports                                                | Teacher have an affinity for sports, are uncomplicated, pragmatic and self-confident (hands-on attitude);<br>Personal preferences for individual intervention components exist;<br>Fearfulness due to the liability issue was existent, but could be removed through qualification and information intervention components |
| Champion                    | Occupational physician was a champion                                                                                      | Heads of the nursing education program and of the school subject of nursing are champions                                                                                                                                                                                                                                  |
| Commitment                  | No commitment, people seem annoyed;<br>Acceptance and awareness of the importance of physical activity needs to be created | High level of commitment (on the part of the teachers and apprentices)                                                                                                                                                                                                                                                     |

|               |                                                                          |                                                                                                                                                                                              |
|---------------|--------------------------------------------------------------------------|----------------------------------------------------------------------------------------------------------------------------------------------------------------------------------------------|
| Empowerment   | <i>Not mentioned</i>                                                     | Confidence to continue the project and its intervention even without external support by researchers                                                                                         |
| Qualification | <i>Not mentioned</i>                                                     | Physical activity promotion is not an unknown topic; Necessary qualification (i.e., sports scientist) and own experience in promoting physical activity at school were available and helpful |
| Support       | Support of youth apprentices' representatives;<br>No support of trainers | Active support of fellow teachers                                                                                                                                                            |

*This table was created based on the interview results. The individual factors influencing sustainability represent the subcategories and the respective levels the main categories of the structuring content analysis.*
